# Supplementary material for: Heteronuclear Binary-Atom-Controlled Cobalt-Based Catalyst for Lithium-Sulfur Batteries
Source: Research Square preprint supplement (doi:10.21203/rs.3.rs-8625349/v1), 2026-01-30
Supplement: Supplementary file 1 [file f36831e5520fb6d4a7bb92e2.docx]

**Supporting Information**

**Heteronuclear Binary-Atom-Controlled Cobalt-Based Catalyst for Lithium-Sulfur Batteries**

Qiang. Liu1,2, Feiyu Wang2, Liming Song2,3, Xianwu,Li2, Yong Xiang4,5, Fan Chen5*

1 School of Mechanical Engineering University of Science and Technology Beijing

Beijing 100083, China

2. Inner Mongolia North Hauler Joint Stock Co.,Ltd, Baotou 014010, China，

3.Inner Mongolia University of Science & Technology, Baotou 014010, China

4.Institute of Electronic and Information Engineering of UESTC in Guangdong, Dong Guan 523808, China

5.School of Materials and Energy, University of Electronic Science and Technology of China, Chengdu 611731, China


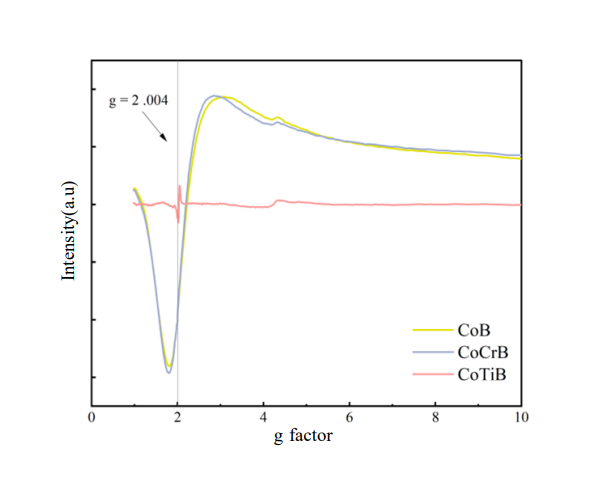


**Figure S1** Electron paramagnetic resonance test.


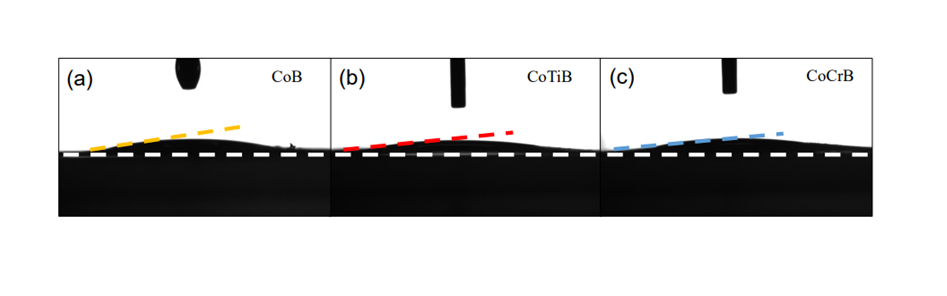


**Figure S2** Contact Angle of CoB, CoTiB and CoCrB
